# Supplementary material for: A Mango Leaf Extract (Zynamite®) Combined with Quercetin Has Exercise-Mimetic Properties in Human Skeletal Muscle
Source: MDPI journal article supplement (doi:10.3390/nu15132848), 2023-06-23
Supplement: s1 [file s1]

**Supplementary Table S1.** Detailed description of Western blotting antibodies and procedures.

| Antibody                                         | Manufacturer company | Catalogue number | Protein molecular weight (kDa) | Gel %   | Protein loaded ( $\mu$ g) | Blotting transfer time (min) | Blocking reagent | Primary antibody concentration | Secondary antibody concentration |
|--------------------------------------------------|----------------------|------------------|--------------------------------|---------|---------------------------|------------------------------|------------------|--------------------------------|----------------------------------|
| Ser <sup>40</sup> Nrf2                           | Abcam                | ab76026          | 100                            | 10      | 15                        | 90                           | BSA 4%           | 1:5000                         | 1:5000                           |
| Total Nrf2                                       | Abcam                | ab62352          | 100                            | 12.5-15 | 12.5                      | 90                           | BSA 4%           | 1:1500                         | 1:5000                           |
| Thr <sup>287</sup> CaMKII                        | Cell Signaling       | 12716            | 51                             | 10      | 10                        | 90                           | BSA 4%           | 1:2000                         | 1:5000                           |
| Thr <sup>180</sup> /Tyr <sup>182</sup> -p38 MAPK | Cell Signaling       | 9211             | 43                             | 7.5-10  | 10                        | 90                           | Blotto 5%        | 1:3000                         | 1:20,000                         |
| Ser <sup>9</sup> GSK3 $\beta$                    | Cell Signaling       | 5558             | 46                             | 12.5-15 | 12.5                      | 90                           | BSA 4%           | 1:1000                         | 1:10,000                         |
| Catalase                                         | Cell Signaling       | 14097            | 60                             | 7.5-10  | 10                        | 90                           | Blotto 5%        | 1:2000                         | 1:5000                           |
| Keap1                                            | Proteintech          | 10503-2-AP       | 70                             | 10      | 7.5                       | 90                           | BSA 4%           | 1:3000                         | 1:10,000                         |
| GSR                                              | Proteintech          | 18257-1-AP       | 52                             | 10      | 8.5                       | 90                           | Blotto 5%        | 1:2000                         | 1:10,000                         |
